# Supplementary material
Source: PubMed Central journal article supplement (PMC4820056)
Supplement: NIHMS62134-supplement-Appendices.pdf [file NIHMS62134-supplement-Appendices.pdf]

1 Appendix A

2

3 **The iLand wildfire module**

4

5 **Development goals**

6 The main goal in developing a wildfire module for iLand, the individual-based forest landscape  
7 and disturbance model (Seidl et al. 2012a, 2012b), was to simulate forest fire regimes as an  
8 emergent property of topography, climate, and vegetation. In order to enable the investigation of  
9 climate change effects on the fire regime a process-based framework was chosen (see Seidl et al.  
10 2011), modeling the principal processes of ignition, spread, vegetation impact, and extinction  
11 explicitly. Furthermore, the module should be able to simulate the complex and heterogeneous  
12 fire patterns characteristic for mixed severity fire regimes (Perry et al. 2011) as an emergent  
13 property of the system, making use of the high spatial resolution of iLand and the ability to  
14 account for processes of fire susceptibility down to the level of individual trees. However,  
15 considering the general purpose of the iLand simulation platform as tool for scenario analysis  
16 with regard to forest landscape dynamics (Seidl et al. 2012a, 2012b), a detailed simulation of  
17 e.g., fire behavior (such as described by Andrews et al. 2005) was outside the scope of our  
18 modeling. Considering the large amount of experience with wildfire modeling in forest  
19 landscape simulators (Keane et al. 2004, Seidl et al. 2011) we did not venture to develop a novel  
20 wildfire simulation approach but rather based our modeling on previous works (in particular that  
21 of Wimberly (2002), Schumacher et al. (2006), Wimberly and Kennedy (2008), and Keane et al.  
22 (2011)), as adapted to the structure of iLand and the context of the development goals described  
23 above.

24

## 25 **Fire ignition**

26 Fire ignition modeling in iLand is based on the approach of FireBGC v2 (Keane et al. 2011).

27 Fuel availability, fire weather, fire suppression, and historical fire probability influence fire  
28 ignition. A minimum threshold of 0.05 kg fuel biomass per meter squared is required in order for  
29 a fire to ignite (see the description of fuel modeling below). The base fire ignition probability  
30 ( $P_{base}$ ) is derived as the inverse of the site-specific fire return interval (i.e., the number of years  
31 between fires for all land area within a site; Keane et al. 2011), modified to account for  
32 landscape area and fire size (Eq. A1).

$$P_{base} = \frac{1}{MFRI_i} \cdot r_{fire} \quad \text{Eq. A1}$$

33 with

$$r_{fire} = \frac{cell}{size_i}$$

34 and  $MFRI_i$  the mean fire return interval at cell  $i$ ,  $size_i$  the average fire size, and  $cell$  the pixel size  
35 of the fire simulations (here: 20m × 20m). Fire weather and fire management modify the base  
36 fire probability (see Wimberly and Kennedy 2008). Fire weather is characterized by the Keetch  
37 Byram Drought Index ( $KBDI$ ) (Keetch and Byram 1968, Keane et al. 2011). The  $KBDI$   
38 calculates a simplified water balance for the fuel layer and ranges from 0 (no drought) to 800  
39 (severe drought).  $KBDI$  is updated daily by subtracting the rainfall reaching the forest floor (i.e.,  
40 after interception losses have been accounted for), and by adding a drying factor computed from  
41 maximum daily temperature and mean annual precipitation. To modify the ignition probability in  
42 accordance with the fire weather of every simulation year we calculate an annual fire weather  
43 index as cumulative sum over the daily  $KBDI$  values, and relate this cumulative sum to its

44 theoretical maximum value (relative cumulative  $KBDI$ ,  $rcKBDI$ , Eq. A2). Due to its cumulative  
 45 nature  $rcKBDI$  is sensitive to changes in both fire season length and fire weather severity.

$$rcKBDI = \frac{\sum_{t=1}^{365} KBDI_t}{800 \cdot 365} \quad \text{Eq. A2}$$

46 This composite indicator of drought severity and fire season length is dynamically calculated in  
 47 the simulation based on the climatic drivers input to the model. In order to modify the  
 48 empirically specified  $P_{base}$  to the climate conditions of the respective simulation year,  $rcKBDI$  is  
 49 related to the average index of the reference period for which  $P_{base}$  was specified ( $rcKBDI_{ref}$ , the  
 50 mean over the period 1501-2000 in this study; Eq. A3).

$$r_{climate} = \frac{rcKBDI}{rcKBDI_{ref}} \quad \text{Eq. A3}$$

51 Changes in wildfire suppression activities are accounted for in a similar manner as different fire  
 52 season conditions. A scalar for fire suppression ( $r_{mgmt}$ ) is defined relative to the suppression  
 53 activities of the reference period for which  $P_{base}$  was defined. If  $r_{mgmt} > 1$  fire suppression is  
 54 intensified and ignition probability decreased, whereas the opposite is the case if  $r_{mgmt} < 1$ . For  
 55 the current study  $r_{mgmt}$  was set to 1. The final ignition probability  $P_{ignition}$  is calculated via the  
 56 odds ratio (Wimberly and Kennedy 2008, Eq. A4), and evaluated against a uniform random  
 57 number to determine whether a fire is ignited in a given cell.

$$odds_{base} = \frac{P_{base}}{1 - P_{base}} \quad \text{Eq. A4}$$

$$odds_{ignition} = odds_{base} \cdot r_{climate} \cdot r_{mgmt}^{-1}$$

$$P_{ignition} = \frac{odds_{ignition}}{1 + odds_{ignition}}$$

58 It has to be noted that the thus modeled ignitions do not represent the total number of ignitions  
59 on the landscape but relate only to the subset that develops into (detected and recorded)  
60 wildfires. In reality there are a (potentially large) number of small ignitions that go undetected  
61 and are thus not accounted for in  $P_{base}$  (see Malamud et al. 2005).

62

### 63 **Fire spread and extinction**

64 Once a fire is ignited at a cell, its spread through the landscape is modeled by means of a cellular  
65 automaton approach with 20m horizontal resolution (cf. He and Mladenoff 1999, Wimberly  
66 2002). Transition probabilities are calculated from slope and wind conditions and are further  
67 modified by the effects of fuel availability and land type. Slope is calculated from a digital  
68 elevation model of 10m horizontal and 1m vertical resolution. Wind speed and direction are  
69 supplied as site-specific input to the model, and are randomly modified within a user-specified  
70 range for every individual fire in order to mimic the variability of fire conditions in the  
71 simulations (Keane et al. 2011). The fire spread to pixels in eight cardinal directions is calculated  
72 following FireBGC v2 (Rothermel 1991, Keane et al. 2011), accounting for wind speed and  
73 different upslope and downslope spread rates. The thus derived base transition probability ( $P_{trans}$ )  
74 is further modified for land type and fuel effects. Land types ( $r_{land}$ ) are specified in a static,  
75 spatially explicit input layer and allow, for instance, to account for lower spread rates of fires in  
76 riparian areas (cf. Wimberly and Kennedy 2008). The fuel modifier ( $r_{fuel}$ ) takes into account that  
77 a minimum fuel level is necessary for the fire to spread into a cell, and is dynamically calculated

78 in the simulation. Both modifiers are applied to derive the final transition probability ( $P_{spread}$ )  
 79 according to Eq. A5.

$$odds_{trans} = \frac{P_{trans}}{1 - P_{trans}} \quad \text{Eq. A5}$$

$$odds_{spread} = odds_{trans} \cdot r_{land} \cdot r_{fuel}$$

$$P_{spread} = \frac{odds_{spread}}{1 + odds_{spread}}$$

80 Every cell only burns for one time step of the cellular automaton, and two pathways of fire  
 81 extinction are considered in the model. First, a fire extinction probability ( $P_{ext}$ ) is applied in the  
 82 simulation of cell-to-cell fire spread, following the approach by Wimberly and Kennedy (2008).  
 83 If a random number is smaller than  $P_{ext}$  the cell is extinguished before it can spread the fire to its  
 84 neighbors. This parameter is currently a calibration parameter helping to achieve realistic fire  
 85 patterns on the landscape (see also Wimberly 2002). Its estimation for the current study is  
 86 described in detail in Appendix B. Second, the overall size of a fire is constrained by a maximum  
 87 fire size drawn from a fire size distribution (see Wimberly and Kennedy 2008, Sturtevant et al.  
 88 2009, Keane et al. 2011). A negative exponential fire size distribution is assumed (He and  
 89 Mladenoff 1999), and the maximum size of an individual burn ( $f_{size}$ ) is stochastically determined  
 90 from the mean fire size of the landscape ( $f_{mean}$ ) and a uniform random number ( $rnd$ , Eq. A6).

$$f_{size} = -\log(1 - rnd) \cdot f_{mean} \quad \text{Eq. A6}$$

91 The above described cellular automaton approach is run until  $f_{size}$  is reached or the simulated fire  
 92 does not spread to any neighboring pixels in one iteration of the cellular automaton.

93

94

95 **Fire severity and effects**

96 Fire severity is modeled following the approach of Schumacher et al. (2006), accounting for the  
97 effects of fuel availability, fuel moisture, as well as tree size- and species-specific resistance,  
98 while not simulating fire intensity explicitly. As a proxy for fuel availability and fuel structure  
99 the iLand detritus pools are used (see Seidl et al. (2012b) for details). The litter pool conceptually  
100 corresponds to 1h and 10h fuels (i.e., fast-drying dead foliage and twigs), while the downed  
101 woody debris (DWD) pool represents the slower drying 100h and 1000h fuels, i.e., bigger  
102 branches and logs. Following Schumacher et al. (2006), the available *fuel* (t biomass per hectare)  
103 is calculated from those pools assuming pool-specific moisture relationships (Eq. A7).

$$fuel = (kfc_1 + kfc_2 \cdot rcKBDI) \cdot FF + kfc_3 \cdot rcKBDI \cdot DWD \quad \text{Eq. A7}$$

104 with *FF* the forest floor biomass (t ha<sup>-1</sup>), and *DWD* the downed woody debris biomass (t ha<sup>-1</sup>),  
105 and *kfc*<sub>1</sub>, *kfc*<sub>2</sub>, and *kfc*<sub>3</sub> empirical parameters, set to 0.8, 0.2, and, 0.4 (Schumacher et al. 2006).  
106 The percentage of crown volume killed depends on fire intensity, tree size and crown form. Fire  
107 intensity is related to the amount of fuel available for combustion, and crown kill (*ck*, fraction) is  
108 thus modeled as a function of stand size (*dbh<sub>eff</sub>*, cm) and available *fuel* (Eq. A8).

$$ck = \min\left(fuel \cdot (kck_1 + kck_2 \cdot dbh_{eff}); 1\right) \quad \text{Eq. A8}$$

109 with *kck*<sub>1</sub> and *kck*<sub>2</sub> empirical parameters, determined to be 0.211 and -0.00445 by Schumacher  
110 et al. (2006) for Rocky Mountains ecosystems. *dbh<sub>eff</sub>* is calculated as average dbh in a 20m cell  
111 in iLand, and is limited to <40cm in Eq. A8, assuming a saturation of the crown kill probability  
112 for mature stands (see Schumacher et al. 2006). Individual tree mortality probability from fire  
113 (*P<sub>mort</sub>*) is modeled according to Ryan and Reinhardt (1988) and Keane et al. (2011), using bark  
114 thickness and crown kill percentage as predictors (Eq. A9).

$$P_{mort} = \frac{1}{1 + e^{-1.94 + 6.32(1 - e^{-bt}) - 5.35ck^2}} \quad \text{Eq. A9}$$

115 where  $bt$  is bark thickness (cm), calculated from a species-specific empirical parameter from the  
 116 dbh of a tree (Schumacher et al. 2006, Keane et al. 2011).

117  
 118 Fire effects on forest floor and DWD pools are derived from Eq. A7, i.e., the portion of the  
 119 respective pools that is considered fuel is also assumed to be consumed by fire. For the trees  
 120 killed by fire, specific consumption rates are defined for foliage (0.90), branch (0.51), and  
 121 stemwood (0.11) compartments (see Fahnestock and Agee 1983, Campbell et al. 2007, Mitchell  
 122 et al. 2009). The remaining C is added to the respective standing and downed detritus pools and  
 123 treated as the C of trees that die from stress-related or chance mortality in iLand (Seidl et al.  
 124 2012b). All trees in the sapling layer (<4m in height) are assumed to be killed by a fire. Soil  
 125 organic matter is generally not considered to be fuel (Schumacher et al. 2006, Keane et al. 2011),  
 126 but a small percentage is assumed to be lost within the fire perimeter due to erosion (Campbell et  
 127 al. 2007, Bormann et al. 2008). More details on the iLand fire module can be found in the online  
 128 model documentation at <http://iLand.boku.ac.at>.

129

### 130 **References**

- 131 Andrews, P. L., C. D. Bevins, and R. C. Seli. 2005. BehavePlus fire modeling system version  
 132 3.0: User's guide. Page 134. Gen. Tech. Rep. RMRS-GTR-106, Department of Agriculture,  
 133 Forest Service, Rocky Mountain Research Station, Ogden, UT.
- 134 Bormann, B. B. T., P. S. Homann, R. L. Darbyshire, and B. A. Morrisette. 2008. Intense forest  
 135 wildfire sharply reduces mineral soil C and N: the first direct evidence. *Canadian Journal of*  
 136 *Forest Research* 38:2771–2783.
- 137 Campbell, J., D. Donato, D. Azuma, and B. Law. 2007. Pyrogenic carbon emission from a large  
 138 wildfire in Oregon, United States. *Journal of Geophysical Research* 112:G04014.

- 139 Fahnestock, G. R., and J. K. Agee. 1983. Biomass consumption and smoke production by  
140 prehistoric and modern forest fires in western Washington. *Journal of Forestry*:653–657.
- 141 He, H., and D. Mladenoff. 1999. Spatially explicit and stochastic simulation of forest-landscape  
142 fire disturbance and succession. *Ecology* 80:81–99.
- 143 Keane, R. E., G. J. Cary, I. D. Davies, M. D. Flannigan, R. H. Gardner, S. Lavorel, J. M.  
144 Lenihan, C. Li, and T. S. Rupp. 2004. A classification of landscape fire succession models:  
145 spatial simulations of fire and vegetation dynamics. *Ecological Modelling* 179:3–27.
- 146 Keane, R. E., R. A. Loehman, and L. M. Holsinger. 2011. The FireBGCv2 landscape fire  
147 succession model : A research simulation platform for exploring fire and vegetation  
148 dynamics. Page 137 Simulation. Gen. Tech. Rep. RMRS-GTR-255, Rocky Mountain  
149 Research Station, U.S. Department of Agriculture, Forest Service, Fort Collins, CO.
- 150 Keetch, J. J., and G. M. Byram. 1968. A drought index for forest fire control. Page 35. U.S.  
151 Department of Agriculture, Forest Service, Southeastern Forest Experiment Station,  
152 Asheville, NC.
- 153 Malamud, B. D., J. D. A. Millington, and G. L. W. Perry. 2005. Characterizing wildfire regimes  
154 in the United States. *Proceedings of the National Academy of Sciences of the United States*  
155 *of America* 102:4694–4699.
- 156 Mitchell, S. R., M. E. Harmon, and K. E. B. O’Connell. 2009. Forest fuel reduction alters fire  
157 severity and long-term carbon storage in three Pacific Northwest ecosystems. *Ecological*  
158 *Applications* 19:643–655.
- 159 Perry, D. A., P. F. Hessburg, C. N. Skinner, T. A. Spies, S. L. Stephens, A. H. Taylor, J. F.  
160 Franklin, B. McComb, and G. Riegel. 2011. The ecology of mixed severity fire regimes in  
161 Washington, Oregon, and Northern California. *Forest Ecology and Management* 262:703–  
162 717.
- 163 Rothermel, R. C. 1991. Predicting Behavior and Size of Crown Fires in the Northern Rocky  
164 Mountains. Page 46 October. Res. Pap. INT-438, U.S. Department of Agriculture, Forest  
165 Service, Intermountain Research Station, Ogden, UT.
- 166 Ryan, K. C., and E. D. Reinhardt. 1988. Predicting postfire mortality of seven western conifers.  
167 *Canadian Journal of Forest Research* 18:1291–1297.
- 168 Schumacher, S., B. Reineking, J. Sibold, and H. Bugmann. 2006. Modeling the impact of climate  
169 and vegetation on fire regimes in mountain landscapes. *Landscape Ecology* 21:539–554.
- 170 Seidl, R., P. M. Fernandes, T. F. Fonseca, F. Gillet, A. M. Jönsson, K. Merganičová, S. Netherer,  
171 A. Arpacı, J.-D. Bontemps, H. Bugmann, J. R. González-Olabarria, P. Lasch, C. Meredieu,  
172 F. Moreira, M.-J. Schelhaas, and F. Mohren. 2011. Modelling natural disturbances in forest  
173 ecosystems: a review. *Ecological Modelling* 222:903–924.



174 Seidl, R., W. Rammer, R. M. Scheller, and T. A. Spies. 2012a. An individual-based process  
175 model to simulate landscape-scale forest ecosystem dynamics. *Ecological Modelling*  
176 231:87–100.

177 Seidl, R., T. A. Spies, W. Rammer, E. A. Steel, R. J. Pabst, and K. Olsen. 2012b. Multi-scale  
178 drivers of spatial variation in old-growth forest carbon density disentangled with Lidar and  
179 an individual-based landscape model. *Ecosystems* 15:1321–1335.

180 Sturtevant, B. R., R. M. Scheller, B. R. Miranda, D. Shinneman, and A. Syphard. 2009.  
181 Simulating dynamic and mixed-severity fire regimes: A process-based fire extension for  
182 LANDIS-II. *Ecological Modelling* 220:3380–3393.

183 Wimberly, M. 2002. Spatial simulation of historical landscape patterns in coastal forests of the  
184 Pacific Northwest. *Canadian Journal of Forest Research* 32:1316–1328.

185 Wimberly, M., and R. Kennedy. 2008. Spatially explicit modeling of mixed-severity fire regimes  
186 and landscape dynamics. *Forest Ecology and Management* 254:511–523.

187

188

189 Appendix B

190

## 191 **Parameterization and evaluation of the iLand wildfire module**

192

193 The parameterization and evaluation of the iLand wildfire module for application at the HJ  
194 Andrews Experimental Forest (HJA) focused on the period 1501 to 2000, using the climate, soil,  
195 and vegetation data compiled by (Seidl et al. 2012). Topographic information for the HJA  
196 watershed was derived from Lidar data (Spies 2011) and was gridded to 10 m horizontal  
197 resolution. Key parameters such as mean fire-return interval (at 100 m spatial resolution) and the  
198 landscape scale fire size distribution were determined from reconstructions of the fire history at  
199 HJA (Teensma 1987, Weisberg 1998, Tepley 2010, Seidl et al. 2012, Tepley et al. 2013).

200

### 201 **Model parameterization**

202 To parameterize extinction probability  $P_{ext}$ , a crucial parameter for the shape and size of  
203 simulated fires in the cellular automaton fire spread routine of iLand (see also Wimberly 2002), a  
204 parameterization experiment was designed using fire history data as reference. In this  
205 experiment, we started fires with random ignition locations within the reconstructed perimeters  
206 of burnt patches. Using the simulated vegetation structure and fuel loads in the year prior to the  
207 fire we simulated 100 replicates for each fire recorded in the fire history reconstruction. We  
208 independently drew a maximum fire size for every ignition from the historically observed (i.e.,  
209 reconstructed) distribution (cf. Eq. A6, Appendix A), and randomly drew wind direction (0 to  
210  $360^\circ$ ) and wind speed (between 10 and  $25 \text{ m s}^{-1}$ ) for every iteration. From these simulations we  
211 iteratively determined  $P_{ext}$  by comparing metrics of simulated fire shape to those reconstructed

212 for historical fires. The evaluation metrics used were fractal dimension index, shape index, and  
213 the relationship between fire size and fire perimeter (see McGarigal et al. 2002, Wimberly 2002).  
214 As starting point for  $P_{ext}$  we used data reported by Wimberly (2002). Figures B1 and B2 show  
215 the results for an extinction probability of 0.24, which was the endpoint of the parameterization  
216 procedure after 23 iterations.

217

218 In addition to extinction probability we also adapted the empirical crown kill function  
219 implemented in iLand (Eq. A8, Appendix A), originally parameterized for Rocky Mountains  
220 ecosystems by Schumacher et al. (2006), to western Cascades ecosystems. The final parameters  
221  $kck_1$  and  $kck_2$  were set to 0.0851 and -0.00185, respectively. With these parameters the mean  
222 simulated proportion of low severity fires (47%) compared well to the findings of Weisberg  
223 (1998), who estimated it to be 42% for western Cascades landscapes based on tree ring analyses.  
224 Furthermore, Agee (1993) reported approximately 16% high severity patches in mountain forests  
225 of the southern Oregon Cascades, which is close to the simulated 20% (mean over all simulated  
226 fires in the parameterization experiment). Generally, the model simulated a mixed severity fire  
227 regime for the HJA (Figure B3), which is in line with the analysis of Perry et al. (2011), who  
228 report a mixed severity regime (with a considerable share of high severity patches) for Douglas-  
229 fir/ western hemlock forest types.

230

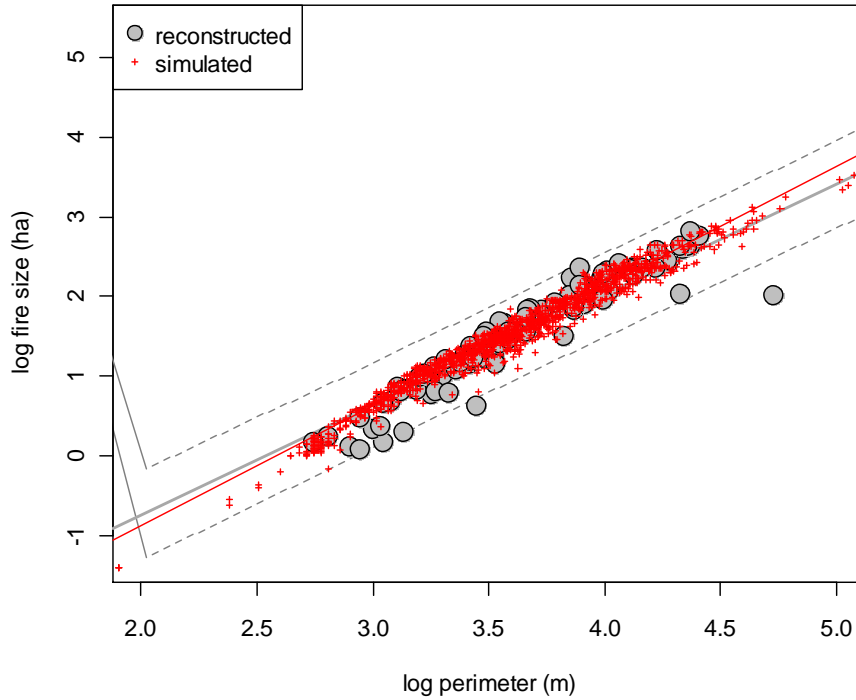

231

232 Figure B1: Fire size over fire perimeter for reconstructed fire patches (grey) and simulated fire  
 233 patches (red). Solid lines give linear relationships in log-log space, with dashed grey lines the  
 234 confidence interval of the linear model for reconstructed fires.

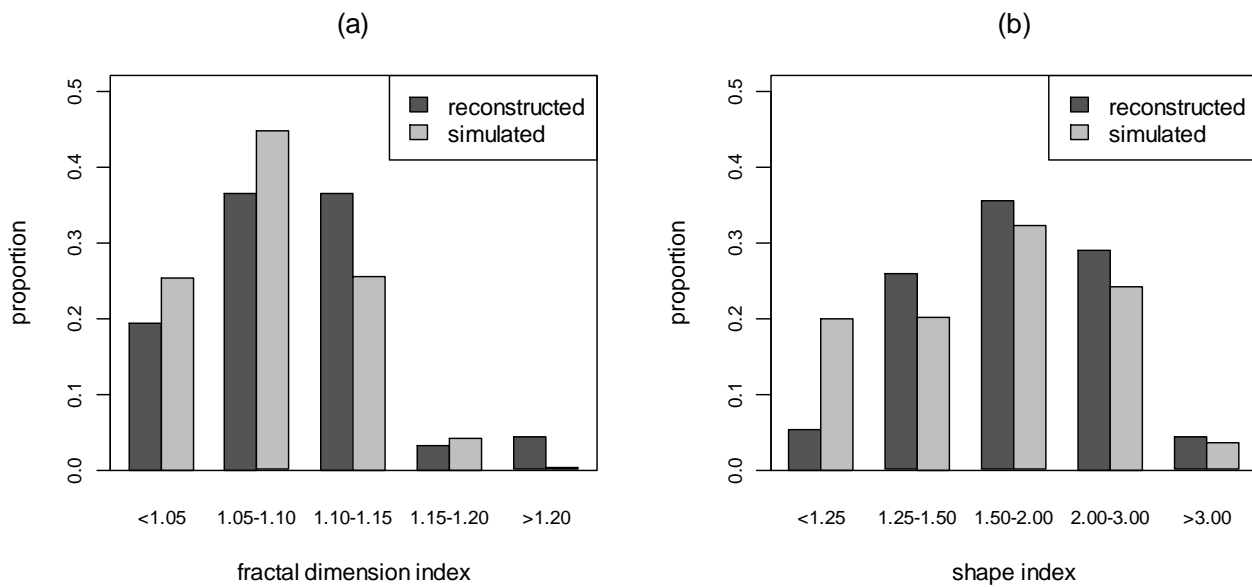

235

236 Figure B2: Reconstructed and simulated fire shapes for fire patches at the HJA after  
237 parameterization. For description of the fire complexity metrics fractal dimension index and  
238 shape index see McGarigal et al. (2002).  
239

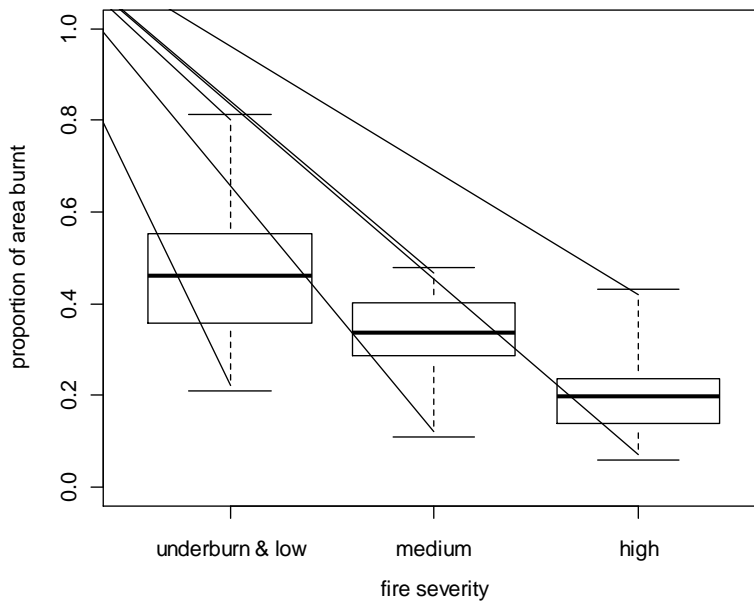

240  
241 Figure B3: Simulated fire severity at the HJ Andrews Experimental Forest. Boxplots indicate the  
242 distribution of proportion of area burnt over severity classes for 100 replicated fires in each of  
243 the 13 fire years reconstructed for the period 1501 to 2000. The central indicator gives the  
244 median value, boxes indicate the interquartile range, and whiskers extend to the extreme values.

245

246

### 247 **Model evaluation**

248 After parameterizing the model we conducted a series of simulation runs from 1501 to 2000 to  
249 evaluate the full dynamic behavior of the model (i.e., the interactions between stand dynamics,

250 fuel buildup, fire occurrence, spread, severity, and feedbacks on vegetation development), and  
251 assess whether a realistic fire regime is emerging from dynamic iLand simulations at HJA. These  
252 runs were started from the last landscape-level burn in year 1500 (legacy scenario L1), and ten  
253 replicated 500 year simulations were conducted. To evaluate the model we compared the  
254 simulated fire size distribution as well as the mean fire return interval to expectations from fire  
255 history reconstructions for the HJA landscape. The simulated mean fire size over all fires and  
256 replicates (916 ha) corresponded well to the reconstructed mean fire size for the HJA (965 ha).  
257 Furthermore, the strongly skewed fire size distribution resulting from the simulations is well in  
258 line with expectations (Figure B4). The dynamically simulated mean fire return interval (MFRI)  
259 of 218 years for the entire HJA landscape was slightly lower than the reconstructed value (262  
260 years). However, the expected pattern of decreasing MFRI with increasing elevation was  
261 reproduced by the dynamic fire simulations with iLand (Figure B5).  
262

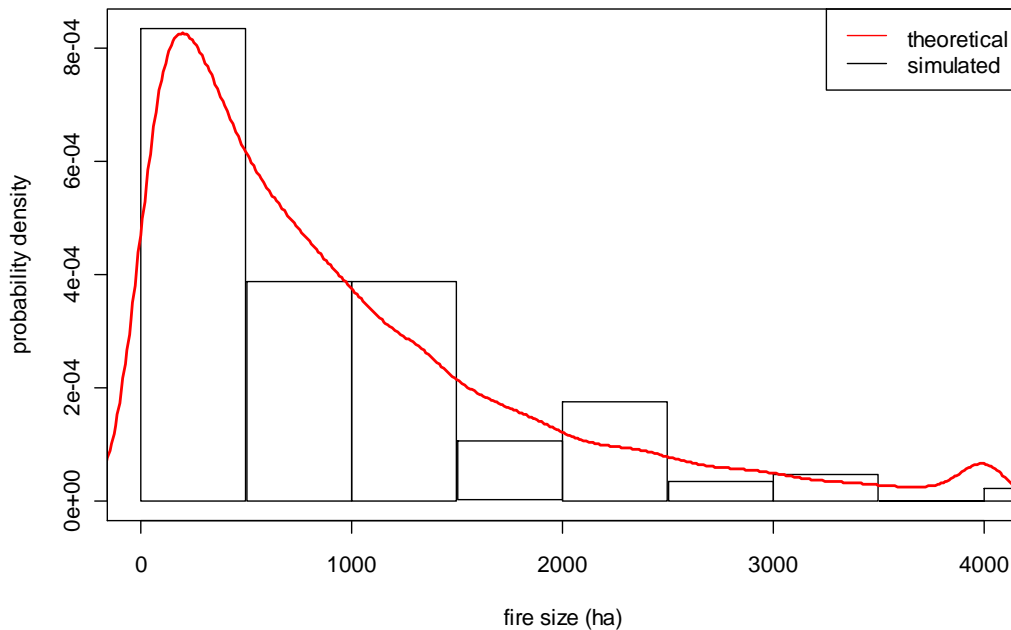

263

264 Figure B4: Simulated versus theoretically expected fire size distribution (assuming a min-max  
 265 constrained negative exponential fire size distribution, parameterized with reconstructed mean  
 266 fire size). Simulation results are derived from ten replicated 500 year simulations.

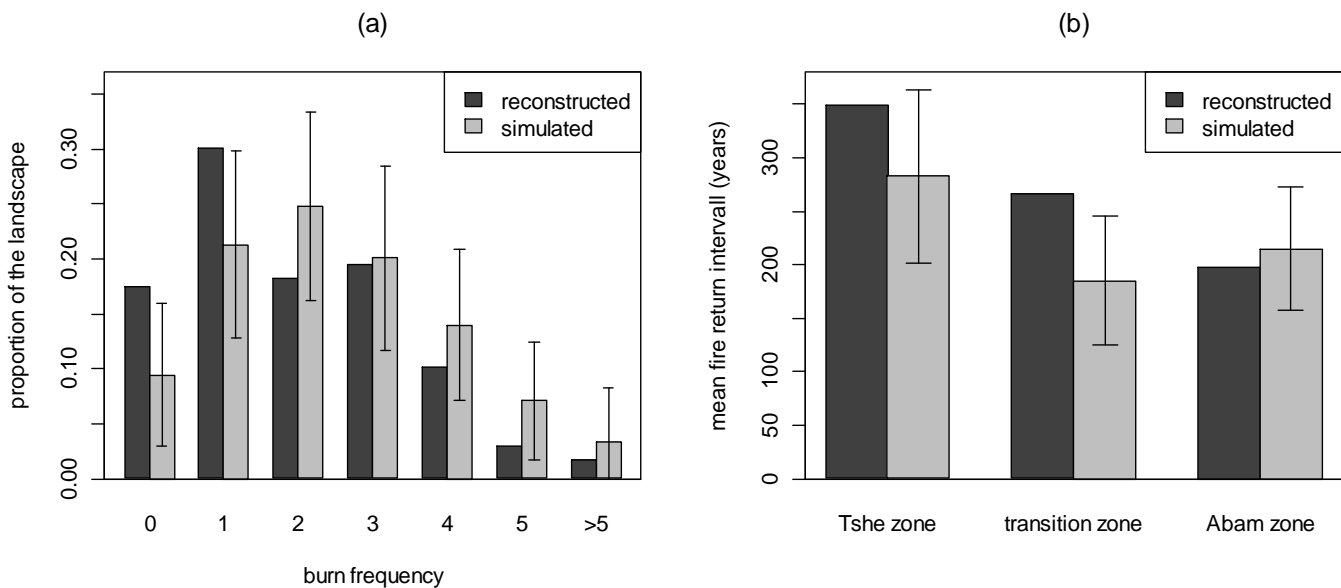

267  
 268 Figure B5: (a) Reconstructed and simulated burn frequency in the years 1501 - 2000 at HJA. (b)  
 269 Reconstructed and simulated mean fire return interval in the three major vegetation zones at  
 270 HJA. Tshe: *Tsuga heterophylla* zone (low elevation), transition zone (mid elevation), Abam:  
 271 *Abies amabilis* zone (high elevation). Whiskers indicate the standard deviation around the mean  
 272 of 10 replicated simulation runs.

273

274

275 **References**

276 Agee, J. K. 1993. Fire ecology of Pacific Northwest forests. Page 505. Island Press, Washington,

277 DC.

278 McGarigal, K., S. Cushman, M. Neel, and E. Ene. 2002. FRAGSTATS: Spatial Pattern Analysis  
279 Program for Categorical Maps. Computer software program produced by the authors at the  
280 University of Massachusetts, Amherst.  
281 <http://www.umass.edu/landeco/research/fragstats/fragstats.html>.

282 Perry, D. A., P. F. Hessburg, C. N. Skinner, T. A. Spies, S. L. Stephens, A. H. Taylor, J. F.  
283 Franklin, B. McComb, and G. Riegel. 2011. The ecology of mixed severity fire regimes in  
284 Washington, Oregon, and Northern California. *Forest Ecology and Management* 262:703–  
285 717.

286 Schumacher, S., B. Reineking, J. Sibold, and H. Bugmann. 2006. Modeling the impact of climate  
287 and vegetation on fire regimes in mountain landscapes. *Landscape Ecology* 21:539–554.

288 Seidl, R., T. A. Spies, W. Rammer, E. A. Steel, R. J. Pabst, and K. Olsen. 2012. Multi-scale  
289 drivers of spatial variation in old-growth forest carbon density disentangled with Lidar and  
290 an individual-based landscape model. *Ecosystems* 15:1321–1335.

291 Spies, T. A. 2011. LiDAR data (August 2008) for the Andrews Experimental Forest and  
292 Willamette National Forest study areas. H. J. Andrews Experimental Forest. Forest Science  
293 Data Bank, Corvallis, OR.  
294 <http://andrewsforest.oregonstate.edu/data/abstract.cfm?dbcode=GI010>.

295 Teensma, P. D. A. 1987. Fire history and fire regimes of the central western Cascades of Oregon.  
296 University of Oregon.

297 Tepley, A. J. 2010. Age structure, developmental pathways, and fire regime characterization of  
298 Douglas-fir/ western hemlock forests in the Central Western Cascades of Oregon. Oregon  
299 State University.



300 Tepley, A. J., F. J. Swanson, and T. A. Spies. 2013. Fire-mediated pathways of stand  
301 development in Douglas-fir/ western hemlock forests of the Pacific Northwest, USA.  
302 Ecology:in press.

303 Weisberg, P. J. 1998. Fire history, fire regimes, and development of forest structure in the  
304 Central Western Oregon Cascades. Oregon State University.

305 Wimberly, M. 2002. Spatial simulation of historical landscape patterns in coastal forests of the  
306 Pacific Northwest. Canadian Journal of Forest Research 32:1316–1328.

307

308

309 Appendix C

310

311 **Additional results and analyses of legacy effects on forest ecosystem structure, composition,**  
312 **and functioning**

313

314 Appendix C gives additional simulation results and presents additional analyses with the aim to  
315 aid the interpretation of the results and conclusions presented in the main paper. Table C1  
316 gives the scenario differences in TEC, RI, and LSS for four points in time, and tests their  
317 significance relative to the scenario assuming historic legacy levels and disturbance regimes  
318 (L1F1). Table C2 presents annualized change rates in the same ecosystem indicators for  
319 different time periods. Figure C1 shows the progression of live C density over time at the  
320 landscape scale in different legacy scenarios, and indicates that initial live tree legacies persist  
321 well into the second century of the 500-year study period (cf. Figure 3). As a test of differences  
322 in the multi-indicator phase space of TEC, RI, and LSS Table C3 contains a distance measure  
323 between the scenarios as well as a test for its statistical significance, given the within- and  
324 between scenario variation. Finally, Table C4 presents further results from the simulation  
325 model with regard to important indicators of ecosystem functioning, aiding the causal  
326 interpretation of our findings.

327

328

Table C1: Scenario differences in four points in time, relative to the simulations assuming historic legacy levels and disturbance regime (L1F1). Differences were tested for significance by means of a Wilcoxon signed rank sum test, and significant values ( $\alpha=0.05$ ) are highlighted in bold.

| legacy | fire frequency | functioning<br>TEC<br>(Mg C ha <sup>-1</sup> ) |                               |                               |                               | structure<br>RI<br>(dimensionless) |                              |                              |                              | composition<br>LSS<br>(%) |                              |                              |                              |
|--------|----------------|------------------------------------------------|-------------------------------|-------------------------------|-------------------------------|------------------------------------|------------------------------|------------------------------|------------------------------|---------------------------|------------------------------|------------------------------|------------------------------|
|        |                | year 1                                         | year 51                       | year 151                      | year 501                      | year 1                             | year 51                      | year 151                     | year 501                     | year 1                    | year 51                      | year 151                     | year 501                     |
| L0     | F0             | -30.9                                          | <b>-117.4</b><br>( $<0.001$ ) | <b>-31.6</b><br>( $<0.001$ )  | <b>+133.7</b><br>( $<0.001$ ) | -0.14                              | <b>-0.28</b><br>( $<0.001$ ) | <b>-0.59</b><br>( $<0.001$ ) | <b>-0.61</b><br>( $<0.001$ ) | -17.1                     | <b>-24.8</b><br>( $<0.001$ ) | <b>-22.0</b><br>( $<0.001$ ) | <b>-3.3</b><br>( $<0.001$ )  |
|        | F1             | -30.9                                          | <b>-125.5</b><br>( $<0.001$ ) | <b>-76.9</b><br>( $<0.001$ )  | +37.2<br>(0.054)              | -0.14                              | <b>-0.25</b><br>( $<0.001$ ) | <b>-0.36</b><br>( $<0.001$ ) | -0.07<br>(0.271)             | -17.1                     | <b>-24.3</b><br>( $<0.001$ ) | <b>-29.9</b><br>( $<0.001$ ) | <b>-15.2</b><br>( $<0.001$ ) |
|        | F2             | -30.9                                          | <b>-131.3</b><br>( $<0.001$ ) | <b>-105.1</b><br>( $<0.001$ ) | <b>-40.4</b><br>(0.035)       | -0.14                              | <b>-0.23</b><br>( $<0.001$ ) | <b>-0.21</b><br>( $<0.001$ ) | <b>+0.29</b><br>( $<0.001$ ) | -17.1                     | <b>-24.8</b><br>( $<0.001$ ) | <b>-33.5</b><br>( $<0.001$ ) | <b>-30.0</b><br>( $<0.001$ ) |
| L1     | F0             | $\pm 0.0$                                      | <b>+20.3</b><br>( $<0.001$ )  | <b>+56.3</b><br>( $<0.001$ )  | <b>+125.7</b><br>( $<0.001$ ) | $\pm 0.00$                         | <b>-0.08</b><br>( $<0.001$ ) | <b>-0.33</b><br>( $<0.001$ ) | <b>-0.65</b><br>( $<0.001$ ) | $\pm 0.0$                 | <b>+2.0</b><br>(0.004)       | <b>+10.7</b><br>( $<0.001$ ) | <b>+9.1</b><br>( $<0.001$ )  |
|        | F1             | -                                              | -                             | -                             | -                             | -                                  | -                            | -                            | -                            | -                         | -                            | -                            | -                            |
|        | F2             | $\pm 0.0$                                      | -8.8<br>(0.152)               | <b>-50.5</b><br>( $<0.001$ )  | <b>-78.4</b><br>( $<0.001$ )  | $\pm 0.00$                         | <b>+0.03</b><br>(0.263)      | <b>+0.23</b><br>( $<0.001$ ) | <b>+0.23</b><br>(0.001)      | $\pm 0.0$                 | -1.6<br>(0.207)              | <b>-8.3</b><br>( $<0.001$ )  | <b>-16.9</b><br>( $<0.001$ ) |
| L2     | F0             | +29.9                                          | <b>+64.8</b><br>( $<0.001$ )  | <b>+67.2</b><br>( $<0.001$ )  | <b>+113.1</b><br>( $<0.001$ ) | +0.09                              | <b>+0.05</b><br>( $<0.001$ ) | <b>-0.12</b><br>(0.004)      | <b>-0.62</b><br>( $<0.001$ ) | +13.5                     | <b>+11.3</b><br>( $<0.001$ ) | <b>+14.7</b><br>( $<0.001$ ) | <b>+9.1</b><br>( $<0.001$ )  |
|        | F1             | +29.9                                          | <b>+42.1</b><br>( $<0.001$ )  | <b>+25.8</b><br>(0.012)       | +11.3<br>(0.603)              | +0.09                              | <b>+0.14</b><br>( $<0.001$ ) | <b>+0.10</b><br>(0.039)      | <b>-0.14</b><br>(0.018)      | +13.5                     | <b>+9.0</b><br>( $<0.001$ )  | <b>+8.7</b><br>( $<0.001$ )  | +2.1<br>(0.255)              |
|        | F2             | +29.9                                          | <b>+31.0</b>                  | <b>-41.5</b>                  | <b>-93.0</b>                  | +0.09                              | <b>+0.19</b>                 | <b>+0.39</b>                 | <b>+0.18</b>                 | +13.5                     | <b>+7.7</b>                  | -1.0                         | <b>-17.3</b>                 |

---

|          |         |          |  |          |          |         |  |          |         |          |
|----------|---------|----------|--|----------|----------|---------|--|----------|---------|----------|
| (<0.001) | (0.002) | (<0.001) |  | (<0.001) | (<0.001) | (0.005) |  | (<0.001) | (0.631) | (<0.001) |
|----------|---------|----------|--|----------|----------|---------|--|----------|---------|----------|

---

Table C2: Annualized change rates in ecosystem indicators in three different periods of time. Values in parenthesis indicate the 5<sup>th</sup>-95<sup>th</sup> percentile range over the 25 replicated simulations.

| legacy | fire frequency | functioning<br>TEC<br>(Mg C ha <sup>-1</sup> yr <sup>-1</sup> ) |                          |                          | structure<br>RI<br>(dimensionless 10 <sup>-2</sup> yr <sup>-1</sup> ) |                             |                             | composition<br>LSS<br>(% yr <sup>-1</sup> ) |                             |                             |
|--------|----------------|-----------------------------------------------------------------|--------------------------|--------------------------|-----------------------------------------------------------------------|-----------------------------|-----------------------------|---------------------------------------------|-----------------------------|-----------------------------|
|        |                | yrs 1-50                                                        | yrs 1-100                | yrs 401-500              | yrs 1-50                                                              | yrs 1-100                   | yrs 401-500                 | yrs 1-50                                    | yrs 1-100                   | yrs 401-500                 |
| L0     | F0             | -6.40                                                           | -2.24                    | +0.58                    | +0.089                                                                | +0.092                      | +0.559                      | +0.189                                      | +0.239                      | +0.111                      |
|        | F1             | -6.56<br>(-6.89 - -6.39)                                        | -2.47<br>(-2.92 - -2.26) | +0.37<br>(-0.43 - +1.06) | +0.141<br>(+0.087 - +0.278)                                           | +0.189<br>(+0.094 - +0.385) | +0.467<br>(+0.105 - +0.972) | +0.197<br>(+0.127 - +0.255)                 | +0.198<br>(+0.132 - +0.235) | +0.118<br>(+0.013 - +0.180) |
|        | F2             | -6.68<br>(-7.00 - -6.41)                                        | -2.68<br>(-3.00 - -2.37) | +0.23<br>(-1.04 - +1.08) | +0.168<br>(+0.085 - +0.354)                                           | +0.281<br>(+0.150 - +0.408) | +0.400<br>(+0.068 - +0.759) | +0.187<br>(+0.100 - +0.239)                 | +0.171<br>(+0.113 - +0.224) | +0.104<br>(-0.031 - +0.216) |
| L1     | F0             | -4.27                                                           | -1.07                    | +0.49                    | +0.200                                                                | +0.171                      | +0.343                      | +0.381                                      | +0.388                      | +0.022                      |
|        | F1             | -4.67<br>(-5.61 - -4.29)                                        | -1.48<br>(-2.04 - -1.11) | +0.00<br>(-1.40 - +1.17) | +0.367<br>(+0.207 - +0.748)                                           | +0.380<br>(+0.188 - +0.660) | +0.411<br>(+0.109 - +0.788) | +0.341<br>(+0.264 - +0.399)                 | +0.317<br>(+0.237 - +0.399) | +0.069<br>(-0.039 - +0.205) |
|        | F2             | -4.83<br>(-5.95 - -4.35)                                        | -1.70<br>(-2.31 - -1.22) | +0.13<br>(-1.19 - +1.28) | +0.430<br>(+0.228 - +1.121)                                           | +0.478<br>(+0.241 - +0.786) | +0.258<br>(-0.263 - +0.867) | +0.309<br>(+0.101 - +0.394)                 | +0.279<br>(+0.175 - +0.382) | +0.067<br>(-0.044 - +0.183) |
| L2     | F0             | -3.97                                                           | -1.13                    | +0.45                    | +0.294                                                                | +0.253                      | +0.268                      | +0.297                                      | +0.306                      | +0.015                      |
|        | F1             | -4.41<br>(-4.99 - -3.98)                                        | -1.37<br>(-1.84 - -1.13) | +0.34<br>(-0.41 - +1.35) | +0.478<br>(+0.291 - +0.852)                                           | +0.392<br>(+0.277 - +0.597) | +0.271<br>(+0.011 - +0.555) | +0.252<br>(+0.159 - +0.312)                 | +0.275<br>(+0.205 - +0.324) | +0.060<br>(-0.042 - +0.193) |
|        | F2             | -4.64                                                           | -1.98                    | -0.05                    | +0.579                                                                | +0.670                      | +0.314                      | 0.223                                       | +0.196                      | +0.024                      |

---

|                   |                   |                   |                     |                     |                     |                     |                     |                     |
|-------------------|-------------------|-------------------|---------------------|---------------------|---------------------|---------------------|---------------------|---------------------|
| $(-5.28 - -4.12)$ | $(-2.85 - -1.59)$ | $(-1.36 - +0.89)$ | $(+0.313 - +0.955)$ | $(+0.383 - +1.119)$ | $(+0.050 - +0.702)$ | $(+0.126 - +0.301)$ | $(+0.076 - +0.266)$ | $(-0.112 - +0.142)$ |
|-------------------|-------------------|-------------------|---------------------|---------------------|---------------------|---------------------|---------------------|---------------------|

---

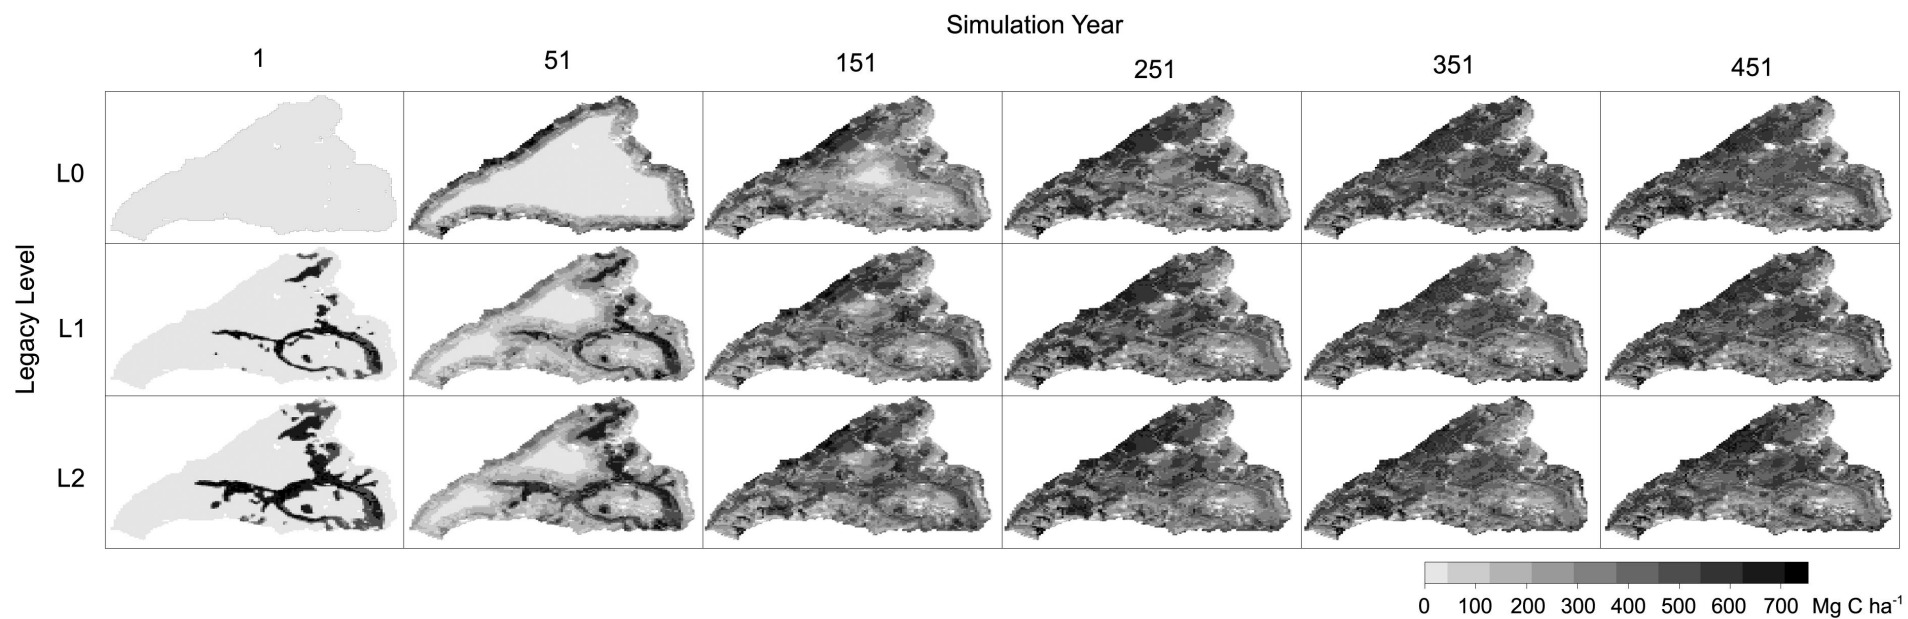

Figure C1: Maps of the 6364-ha HJ Andrews Experimental Forest landscape (grain: 100m grid), showing live ecosystem carbon for six points in time and three legacy levels (L0: no legacies, L1: 12% legacies, L2: 24% legacies). The values are cell-level means over 25 replicated simulations per series and assume the historically observed mean fire return interval of 262 years (scenario F1).

Table C3: Distance between the ecosystem states in the phase space of TEC, RI, and LSS at the end of the 500-year simulation period, expressed by the squared Mahalanobis distance ( $D^2$ ).  $D^2$  is a multidimensional version of a z-score, measuring the distance of a case from the centroid (multidimensional mean) of a distribution, given the covariance (multidimensional variance) of the distribution. Significance levels refer to a  $X^2$  test (with three degrees of freedom), and significant values ( $\alpha=0.05$ ) are highlighted in bold.

|    |    | L0                       |                         |                         | L1                      |                         |                         | L2                      |                |    |
|----|----|--------------------------|-------------------------|-------------------------|-------------------------|-------------------------|-------------------------|-------------------------|----------------|----|
|    |    | F0                       | F1                      | F2                      | F0                      | F1                      | F2                      | F0                      | F1             | F2 |
| L0 | F0 | -                        |                         |                         |                         |                         |                         |                         |                |    |
|    | F1 | <b>10.2</b><br>(0.017)   | -                       |                         |                         |                         |                         |                         |                |    |
|    | F2 | <b>55.5</b><br>(<0.001)  | 4.0<br>(0.257)          | -                       |                         |                         |                         |                         |                |    |
| L1 | F0 | <b>172.4</b><br>(<0.001) | <b>26.7</b><br>(<0.001) | <b>83.6</b><br>(<0.001) | -                       |                         |                         |                         |                |    |
|    | F1 | <b>21.4</b><br>(<0.001)  | <b>14.5</b><br>(0.002)  | <b>32.8</b><br>(<0.001) | <b>18.8</b><br>(<0.001) | -                       |                         |                         |                |    |
|    | F2 | <b>33.3</b><br>(<0.001)  | <b>8.9</b><br>(0.031)   | <b>13.3</b><br>(0.004)  | <b>33.2</b><br>(<0.001) | 4.1<br>(0.247)          | -                       |                         |                |    |
| L2 | F0 | <b>157.0</b><br>(<0.001) | <b>29.3</b><br>(<0.001) | <b>88.9</b><br>(<0.001) | 4.1<br>(0.247)          | <b>19.0</b><br>(<0.001) | <b>31.6</b><br>(<0.001) | -                       |                |    |
|    | F1 | <b>49.2</b><br>(<0.001)  | <b>23.3</b><br>(<0.001) | <b>46.0</b><br>(<0.001) | <b>26.6</b><br>(<0.001) | 1.2<br>(0.765)          | 7.6<br>(0.054)          | <b>22.8</b><br>(<0.001) | -              |    |
|    | F2 | <b>41.5</b><br>(<0.001)  | <b>9.1</b><br>(0.028)   | <b>10.7</b><br>(0.014)  | <b>35.2</b><br>(<0.001) | 3.7<br>(0.292)          | 0.5<br>(0.908)          | <b>31.9</b><br>(<0.001) | 4.6<br>(0.201) | -  |





Table C4: Simulation results for leaf area index (LAI), net primary productivity (NPP), and carbon in the litter and soil compartments over the three legacy (L) and fire frequency (F) scenarios. Values in parenthesis indicate the 5<sup>th</sup>-95<sup>th</sup> percentile range over the 25 replicated simulations.

| legacy | fire frequency | LAI<br>(m <sup>2</sup> m <sup>-2</sup> ) |                       |                       | NPP<br>(Mg C ha <sup>-1</sup> yr <sup>-1</sup> ) |                       |                       | litter and soil C<br>(Mg C ha <sup>-1</sup> ) |                          |                          |
|--------|----------------|------------------------------------------|-----------------------|-----------------------|--------------------------------------------------|-----------------------|-----------------------|-----------------------------------------------|--------------------------|--------------------------|
|        |                | yrs 1-100                                | yrs 401-500           | yrs 1-500             | yrs 1-100                                        | yrs 401-500           | yrs 1-500             | yrs 1-100                                     | yrs 401-500              | yrs 1-500                |
| L0     | F0             | 3.56                                     | 6.22                  | 5.78                  | 6.07                                             | 7.84                  | 8.02                  | 104.5                                         | 142.6                    | 130.0                    |
|        | F1             | 3.27<br>(2.82 – 3.55)                    | 5.77<br>(4.84 – 6.59) | 5.30<br>(4.74 – 5.70) | 5.78<br>(5.41 – 6.06)                            | 7.53<br>(7.00 – 7.93) | 7.64<br>(7.28 – 7.92) | 102.1<br>(98.2 – 104.3)                       | 131.8<br>(117.7 – 144.4) | 120.3<br>(109.4 – 127.2) |
|        | F2             | 3.02<br>(2.59 – 3.34)                    | 4.66<br>(4.09 – 5.40) | 4.50<br>(4.12 – 4.91) | 5.55<br>(5.13 – 5.90)                            | 6.84<br>(6.21 – 7.45) | 7.08<br>(6.76 – 7.40) | 100.2<br>(96.3 – 102.9)                       | 111.3<br>(99.0 – 123.4)  | 106.6<br>(99.1 – 115.7)  |
| L1     | F0             | 4.72                                     | 6.58                  | 6.14                  | 7.28                                             | 8.09                  | 8.26                  | 126.0                                         | 150.6                    | 141.4                    |
|        | F1             | 4.31<br>(3.78 – 4.68)                    | 5.43<br>(4.58 – 6.27) | 5.31<br>(4.93 – 5.81) | 6.91<br>(6.47 – 7.21)                            | 7.39<br>(6.66 – 7.94) | 7.71<br>(7.40 – 8.02) | 121.8<br>(116.2 – 125.4)                      | 129.5<br>(116.3 – 142.7) | 126.4<br>(118.2 – 135.1) |
|        | F2             | 4.04<br>(3.42 – 4.55)                    | 4.54<br>(3.93 – 5.47) | 4.62<br>(4.31 – 5.02) | 6.68<br>(6.06 – 7.14)                            | 6.81<br>(6.17 – 7.70) | 7.18<br>(6.95 – 7.49) | 119.3<br>(111.9 – 124.7)                      | 109.1<br>(95.5 – 123.6)  | 112.7<br>(107.4 – 120.7) |
| L2     | F0             | 4.97                                     | 6.61                  | 6.17                  | 7.39                                             | 8.08                  | 8.22                  | 131.2                                         | 152.1                    | 143.3                    |
|        | F1             | 4.61<br>(4.07 – 4.92)                    | 5.54<br>(4.74 – 6.24) | 5.45<br>(5.14 – 5.80) | 7.07<br>(6.55 – 7.36)                            | 7.59<br>(7.07 – 8.07) | 7.78<br>(7.59 – 8.00) | 126.9<br>(121.6 – 130.7)                      | 130.8<br>(120.4 – 142.5) | 129.8<br>(123.5 – 136.9) |
|        | F2             | 4.19<br>(3.61 – 4.52)                    | 4.58<br>(3.80 – 5.53) | 4.64<br>(4.23 – 5.07) | 6.71<br>(6.04 – 7.08)                            | 6.76<br>(6.08 – 7.66) | 7.15<br>(6.76 – 7.52) | 123.6<br>(117.0 – 127.6)                      | 110.9<br>(92.0 – 128.4)  | 114.2<br>(106.7 – 122.4) |
